# Supplementary material for: Achieving diversified emissive behaviors of AIE, TADF, RTP, dual-RTP and mechanoluminescence from simple organic molecules by positional isomerism
Source: Royal Society of Chemistry journal article supplement (doi:10.1039/d2tc01857h), 2022-01-01
Supplement: d2tc01857h2.pdf [file d2tc01857h2.pdf]

## Supporting Information

### **Achieving Diversified Emissive Behaviors of AIE, TADF, RTP, dual-RTP and Mechanoluminescence from Simple Organic Molecules by Positional Isomerism**

*Yu Xiong\*, Junyi Gong, Junkai Liu, Deliang Wang, Hongzhuo Wu, Zheng Zhao, Manman Fang, Zhen Li, Dong Wang\* and Ben Zhong Tang\**

#### **Table of Contents**

- 1. General methods**
- 2. Synthesis**
- 3. Computational methods**
- 4. Supporting Figures 1-23 and Table S1**
- 5. References**

**1. General methods:** All the reactions were carried out under a nitrogen atmosphere. The starting materials methyl 2-iodobenzoate, and *o*-, *m*-, *p*-chloroanilines, and reagents of Cu powder, CuI were purchased from commercial suppliers and used directly without further purification. <sup>1</sup>H NMR spectra were recorded on a Varian Mercury 400 NMR spectrometer in CDCl<sub>3</sub> using *tetra*-methylsilane as the internal standard. <sup>13</sup>C NMR spectra were recorded on the Bruker AVANCE III HD 600 MHz NMR spectrometer in CDCl<sub>3</sub> using *tetra*-methylsilane as the internal standard. High-resolution mass spectra were recorded on a Finnigan MAT TSQ7000 mass spectrometer system operated in a MALDI-TOF mode. High-performance

liquid chromatography (HPLC) was performed on the Waters e2695 HPLC system using an XBridge™-C18 column (5 mm). The running buffer was 30%H<sub>2</sub>O-70%MeOH. The UV-*vis* absorption spectra were recorded on a UV-2600 spectrophotometer, and the photoluminescence spectra were recorded on a PerkinElmer LS 55 fluorescence spectrometer. Absolute quantum yields were measured by integrating sphere on a Horiba Fluorolog-3 spectrofluorometer. The lifetimes were measured on an Edinburgh FLS980 fluorescence spectrophotometer equipped with a continuous xenon lamp (Xe1), a microsecond pulsed xenon flashlamp (uF920), and a nanosecond flashlamp lamp (nF920), respectively. Single crystal data were collected on a Bruker Smart APEXII CCD diffractometer using graphite monochromated Mo K $\alpha$  radiation ( $\lambda = 0.71073 \text{ \AA}$ ) or Cu K $\alpha$  radiation ( $\lambda = 1.54184 \text{ \AA}$ ). Elemental analysis was performed on an EL cube. The thermogravimetric analysis (TGA) measurements were performed on a TA Instrument TGA Q5000. The differential scanning calorimetry (DSC) measurements were performed on a TA Instrument DSC Q1000. The photos and videos were recorded by a Canon EOS 70D and mobile phone Huawei Pro30.

## 2. Synthesis of target compounds

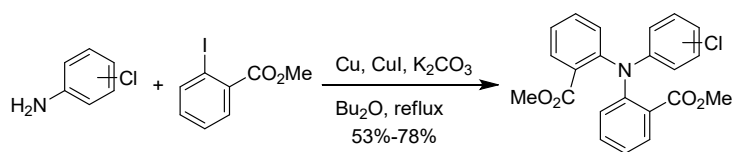

**Scheme S1.** Synthetic route of isomers *o*-CITPA, *m*-CITPA, and *p*-CITPA.

**General experimental procedure:** A three-neck flask equipped with a reflux condensing tube was charged with methyl 2-iodobenzoate (3.93 g, 15.0 mmol), chloroaniline (0.64 g, 5.0 mmol), K<sub>2</sub>CO<sub>3</sub> (1.80 g, 13.0 mmol), Cu (63.6 mg, 1.0 mmol), and CuI (95.2 mg, 0.25 mmol) under nitrogen atmosphere. *n*-butyl ether was injected into the flask and the resulting mixture was heated to reflux under stirring for 48 h. After cooling to room temperature, the solvent was removed under reduced pressure, and the resulting residue was dissolved in dichloromethane and filtered through celite. The collected filtrate was concentrated under reduced pressure and the crude product was purified by silica-gel column chromatography using dichloromethane/hexane as the eluent, followed by recrystallization two times from dichloromethane/hexane to yield crystal.

**Compound *o*-CITPA:** Yield: 1.11 g, 56%. <sup>1</sup>H NMR (400 MHz, CDCl<sub>3</sub>)  $\delta$  (ppm): 7.66 (dd,  $J_1 = 8.0 \text{ Hz}$ ,  $J_2 = 7.6 \text{ Hz}$ , 1H), 7.59 (dd,  $J_1 = 1.2 \text{ Hz}$ ,  $J_2 = 7.6 \text{ Hz}$ , 1H), 7.40–7.32 (m, 3H), 7.17–6.95 (m, 7H), 3.43 (s, 3H), 3.40 (s, 3H). <sup>13</sup>C NMR (150 MHz, CDCl<sub>3</sub>)  $\delta$  (ppm): 167.9, 167.8, 146.7, 146.6, 144.7, 132.3, 132.1, 131.2, 131.2, 130.9, 130.1, 128.4, 127.5, 127.3, 126.9, 125.9, 125.7, 125.5, 123.8, 123.1, 51.8, 51.6. HR-MS (MALDI-TOF),  $m/z$ : calcd for C<sub>22</sub>H<sub>18</sub>ClNO<sub>4</sub>, 395.0924.

Found, 395.0941. Elemental analysis calcd for C<sub>22</sub>H<sub>18</sub>ClNO<sub>4</sub>: C, 66.75; H, 4.58; N, 3.54. Found: C, 66.50; H, 4.46; N, 3.35.

**Compound *m*-CITPA:** Yield: 1.05 g, 53%. <sup>1</sup>H NMR (400 MHz, CDCl<sub>3</sub>) δ (ppm): 7.71–7.69 (m, 2H), 7.46–7.42 (m, 2H), 7.22–7.18 (m, 4H), 7.04 (t, *J* = 8.0 Hz, 1H), 6.82 (dt, *J*<sub>1</sub> = 0.8 Hz, *J*<sub>2</sub> = 8.0 Hz, 1H), 6.69 (t, *J* = 2.0 Hz, 1H), 6.60 (dd, *J*<sub>1</sub> = 2.0 Hz, *J*<sub>2</sub> = 8.0 Hz, 1H), 3.46 (s, 6H). <sup>13</sup>C NMR (150 MHz, CDCl<sub>3</sub>) δ (ppm): 167.4, 149.7, 145.6, 134.6, 132.9, 131.1, 129.9, 129.2, 129.1, 128.1, 124.8, 121.2, 119.8, 118.0, 51.9. HR-MS (MALDI-TOF), *m/z*: calcd for C<sub>22</sub>H<sub>18</sub>ClNO<sub>4</sub>, 395.0924. Found, 395.0968. Elemental analysis calcd for C<sub>22</sub>H<sub>18</sub>ClNO<sub>4</sub>: C, 66.75; H, 4.58; N, 3.54. Found: C, 66.40; H, 4.41; N, 3.41.

**Compound *p*-CITPA:** Yield: 1.54 g, 78%. <sup>1</sup>H NMR (400 MHz, CDCl<sub>3</sub>) δ (ppm): 7.69–7.67 (m, 2H), 7.45–7.41 (m, 2H), 7.20–7.16 (m, 4H), 7.08 (d, *J* = 8.8 Hz, 2H), 6.67 (d, *J* = 8.8 Hz, 2H), 3.45 (s, 6H). <sup>13</sup>C NMR (150 MHz, CDCl<sub>3</sub>) δ (ppm): 167.5, 147.3, 146.0, 132.9, 131.1, 128.9, 128.9, 127.9, 126.2, 124.5, 121.3, 51.9. HR-MS (MALDI-TOF), *m/z*: calcd for C<sub>22</sub>H<sub>18</sub>ClNO<sub>4</sub>, 395.0924. Found, 395.0912. Elemental analysis calcd for C<sub>22</sub>H<sub>18</sub>ClNO<sub>4</sub>: C, 66.75; H, 4.58; N, 3.54. Found: C, 66.45; H, 4.29; N, 3.42.

**3. Computational methods:** The quantum mechanics/molecular mechanics (QM/MM) method was implemented to optimize the geometries and calculate the electronic structures of the three compounds in crystal by virtue of ChemShell 3.5,<sup>[1]</sup> interfacing Turbomole 6.5<sup>[2]</sup> for QM and DL\_POLY<sup>[3]</sup> with the general Amber force field (GAFF)<sup>[4]</sup> for MM. The computational models were built by digging a 5×5×5 supercell from the X-ray crystal structure, and the central molecule acts as the QM part and the surrounding molecules are treated as MM part, as shown in Chart S1-S3. The geometries of QM molecules were fully optimized at B3LYP/6-31G(d) level and the surrounding MM ones were frozen for the three molecular cluster models. The atomic partial charges were generated by the restrained electrostatic potential (RESP) method.<sup>[5]</sup> Based on the optimized geometries in the ground state (S<sub>0</sub>), the excitation energies were calculated by using TD/B3LYP/6-31G(d) for the electronic excited singlet and triplet states. At the same level, the spin-orbit coupling (SOC) matrix elements between singlet and triplet states are given by Beijing Density Function (BDF) program.<sup>[6-8]</sup>

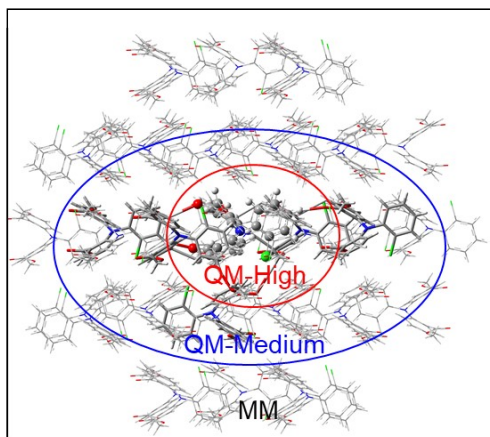

**Chart S1.** QM/MM model of isomer *o*-CITPA: one central QM molecule for the higher layer and the surrounding MM molecules for the lower layer.

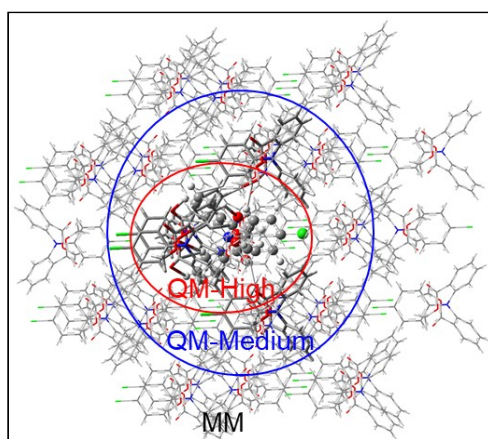

**Chart S2.** QM/MM model of isomer *m*-CITPA: one central QM molecule for the higher layer and the surrounding MM molecules for the lower layer.

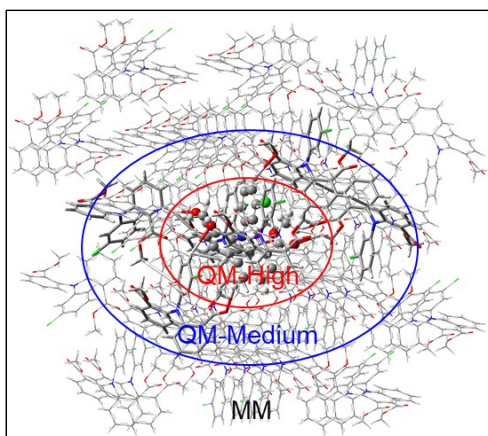

**Chart S3.** QM/MM model of isomer *p*-CITPA: one central QM molecule for the higher layer and the surrounding MM molecules for the lower layer.

## 4. Supporting Figures and Tables

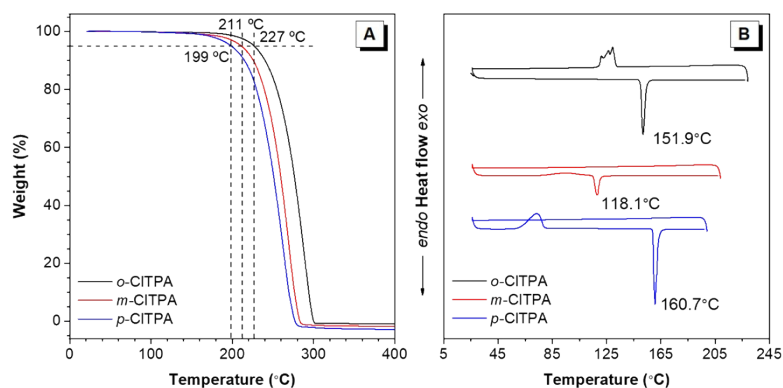

**Figure S1.** (A-B) TGA thermograms and DSC curves of isomers *o*-CITPA, *m*-CITPA, and *p*-CITPA recorded under nitrogen at a heating rate of 10°C/min.

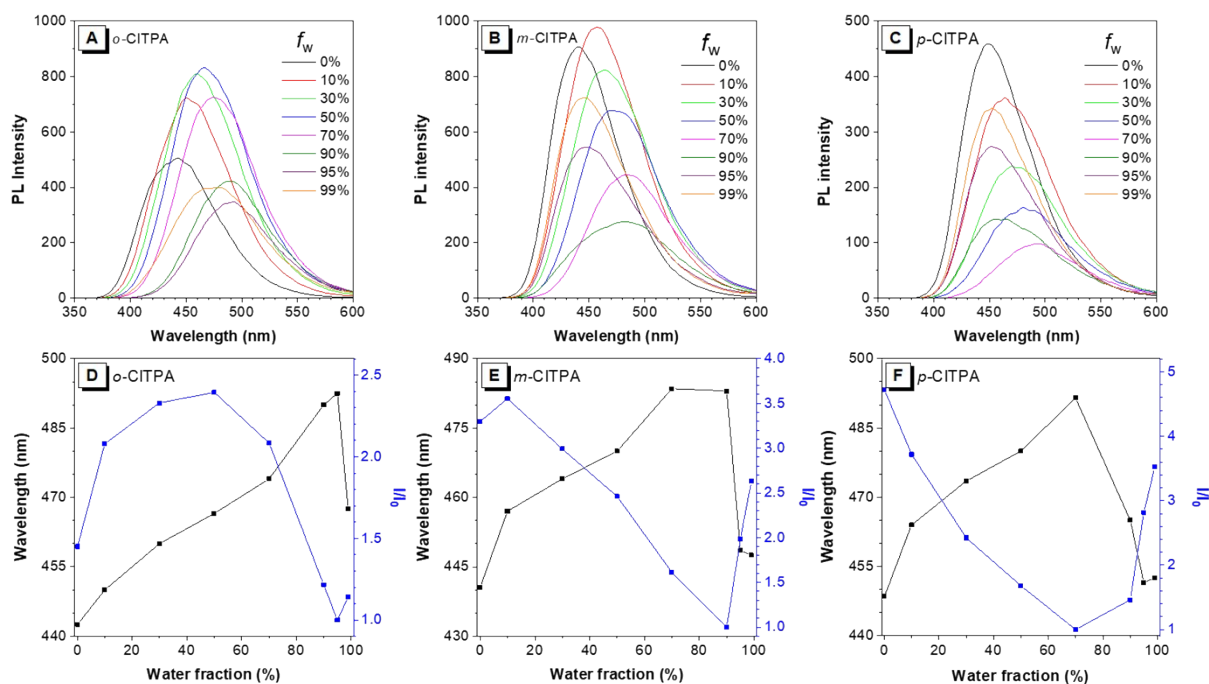

**Figure S2.** (A-C) Steady-state PL spectra of isomers *o*-CITPA, *m*-CITPA, and *p*-CITPA in THF/water mixtures with different water fractions ( $f_w$ ); (D-F) change in PL maximum and relative PL intensity ( $I/I_0$ ) of isomers *o*-CITPA, *m*-CITPA, and *p*-CITPA in THF/water mixtures with different water fractions.  $I_0$  = PL intensity at  $f_w$  = 95%, 90% and 70%, respectively. Concentration: 10  $\mu$ M; excitation wavelength: 300 nm.

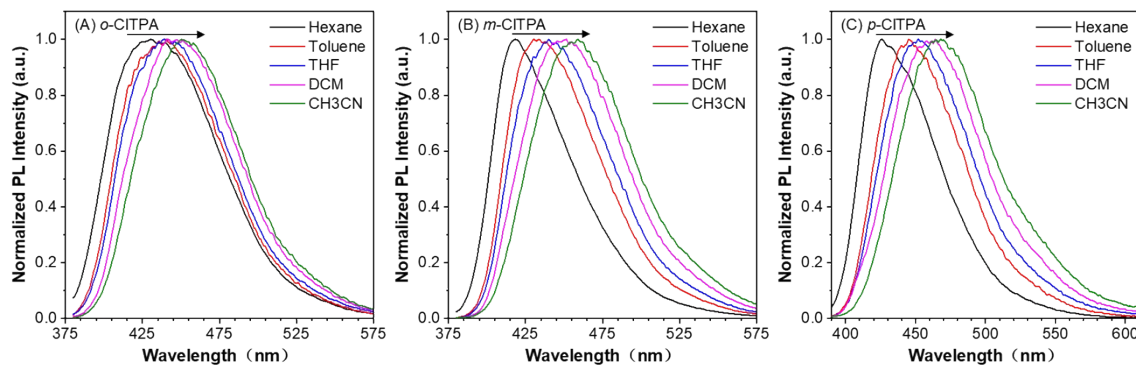

**Figure S3.** (A-C) Steady-state PL spectra of isomers *o*-CITPA, *m*-CITPA, and *p*-CITPA in select solvents with increasing polarity. Concentration: 10  $\mu$ M; excitation wavelength: 300 nm.

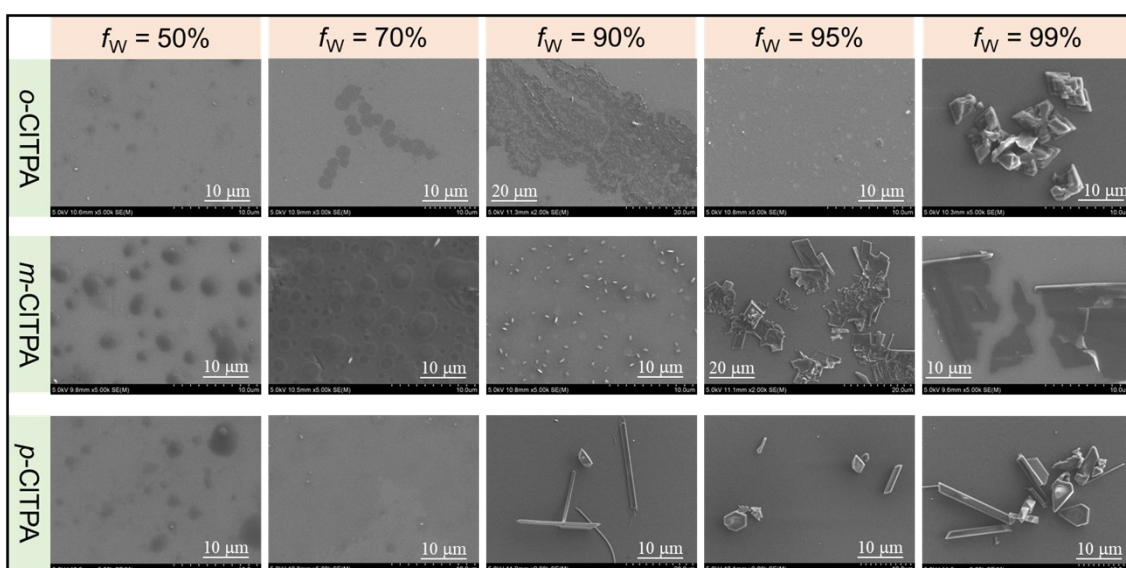

**Figure S4.** SEM images of isomers *o*-CITPA, *m*-CITPA, and *p*-CITPA in THF/water mixtures with different water fractions ( $f_w$ ).

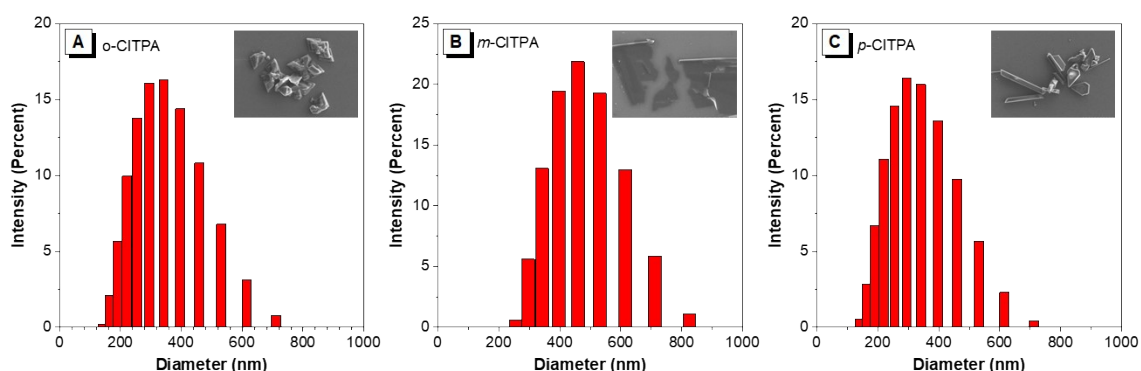

**Figure S5.** (A-C) Dynamic light scattering (DLS) result shows the diameter of isomers *o*-CITPA, *m*-CITPA, and *p*-CITPA in THF/water mixtures with 99% water fractions (Concentration: 10  $\mu$ M). Inset is an SEM image of corresponding nanoparticles.

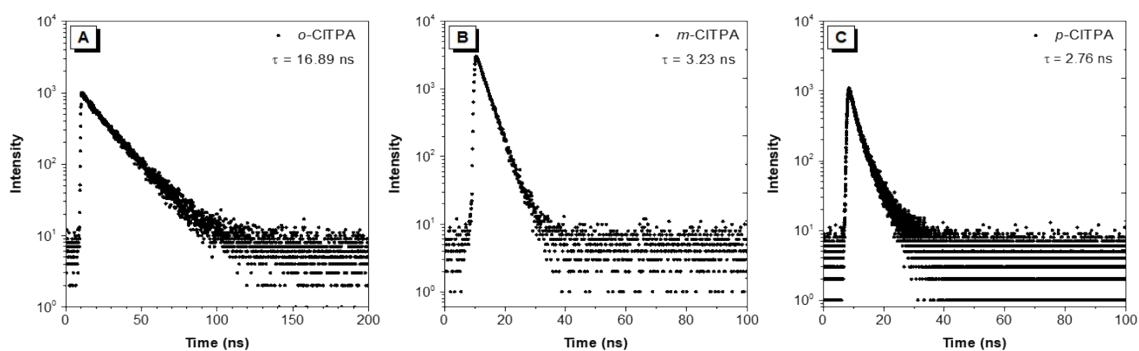

**Figure S6.** Transient prompt emission decay curves of isomers *o*-CITPA, *m*-CITPA, and *p*-CITPA in crystalline solid at room temperature.

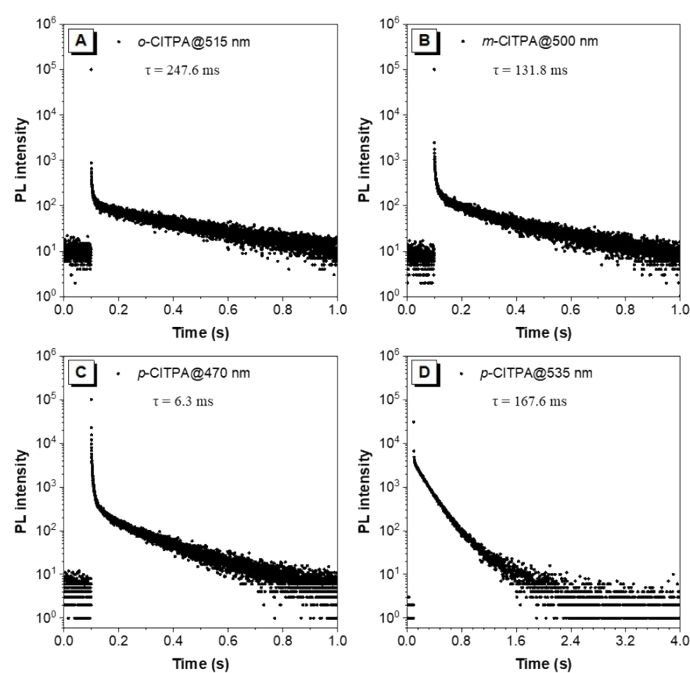

**Figure S7.** (A-D) Transient delayed emission decay curves of isomers *o*-CITPA, *m*-CITPA, and *p*-CITPA in crystalline solid at 77 K.

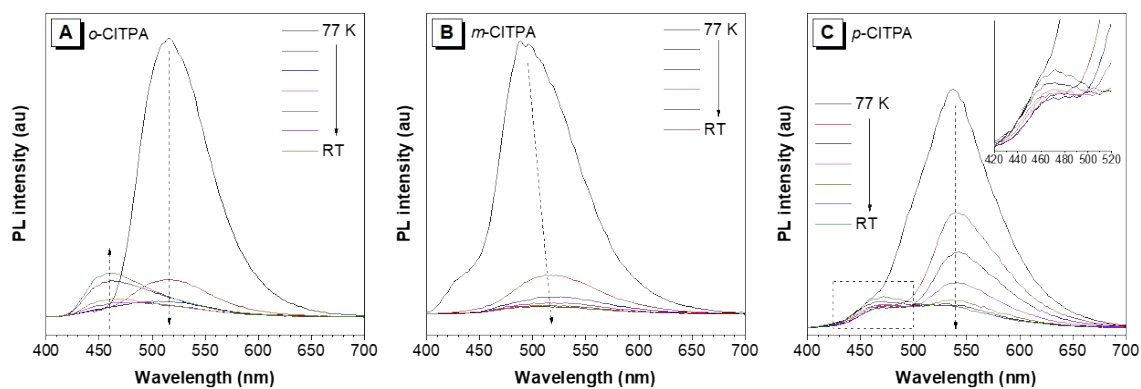

**Figure S8.** (A-C) Temperature-dependent delayed PL spectra of isomers *o*-CITPA, *m*-CITPA, and *p*-CITPA in crystalline solid.



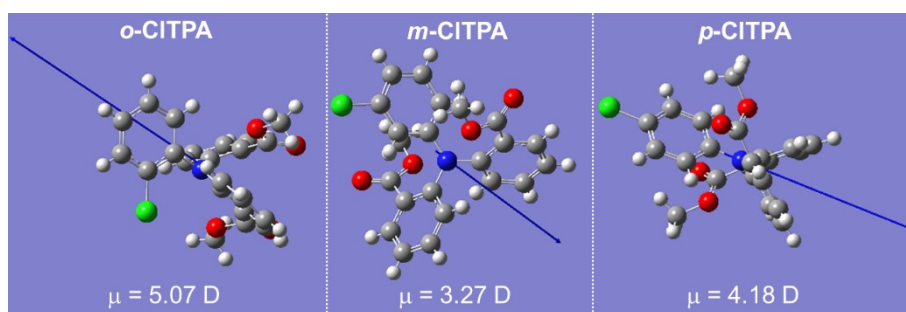

**Figure S9.** Calculated dipole moments of isomers *o*-CITPA, *m*-CITPA, and *p*-CITPA in the crystal state.

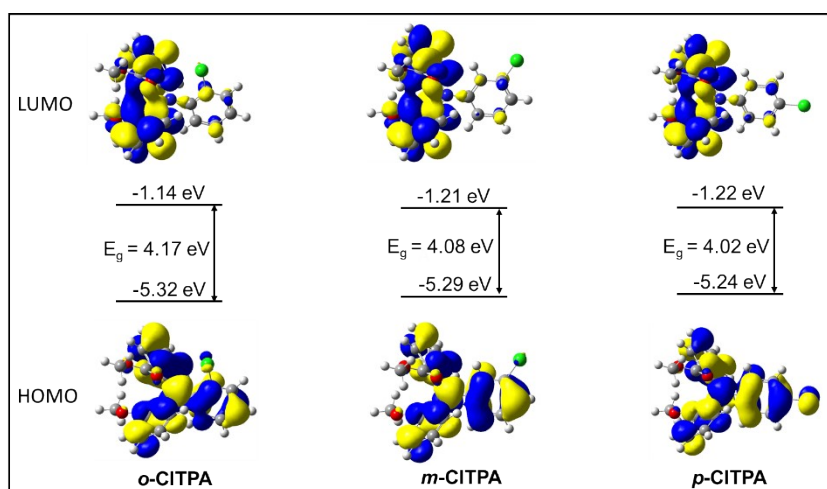

**Figure S10.** Calculated frontier molecular orbitals including HOMO and LUMO of isomers *o*-CITPA, *m*-CITPA, and *p*-CITPA in the gas phase.

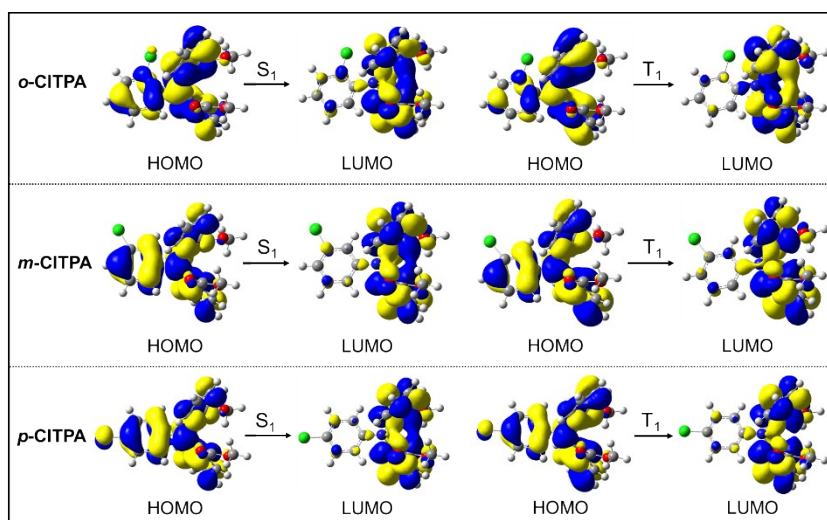

**Figure S11.** The NTOs of isomers *o*-CITPA, *m*-CITPA, and *p*-CITPA calculated in the gas phase.



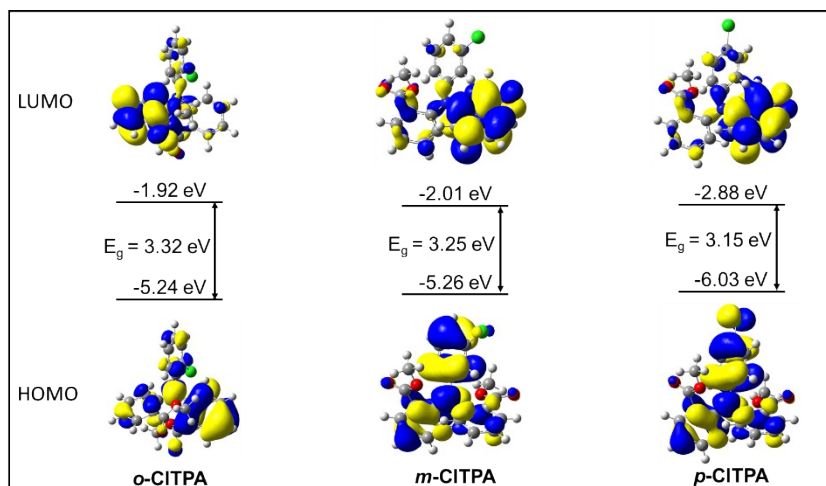

**Figure S12.** Calculated frontier molecular orbitals including HOMO and LUMO of isomers *o*-CITPA, *m*-CITPA, and *p*-CITPA in the crystal phase.

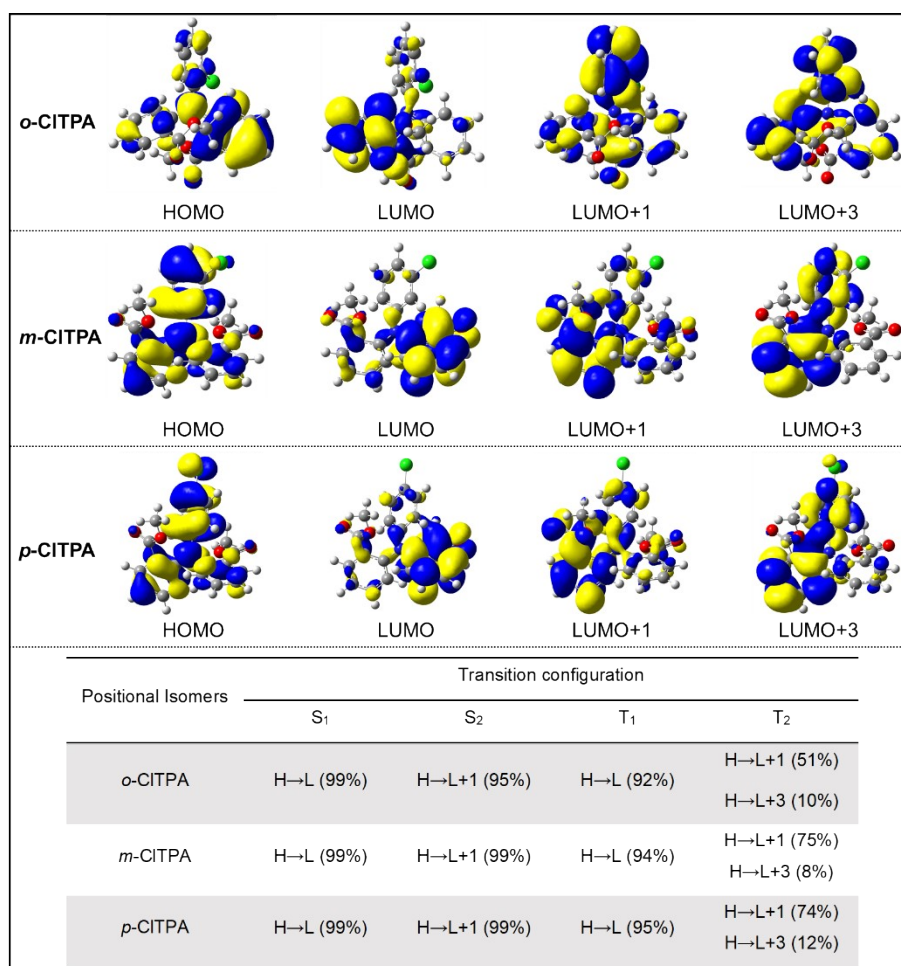

**Figure S13.** The HOMO and LUMO distributions, and transition configurations of excited states of isomers *o*-CITPA, *m*-CITPA, and *p*-CITPA calculated in the crystal phase.

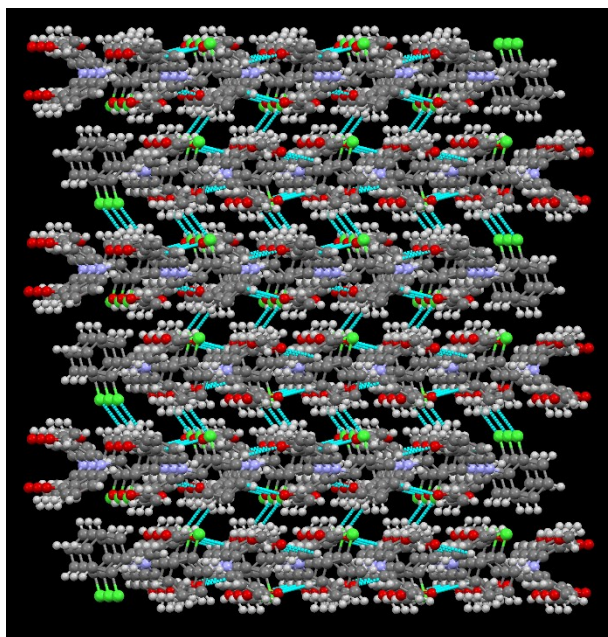

**Figure S14.** Packing mode of isomer *o*-CITPA in crystal.

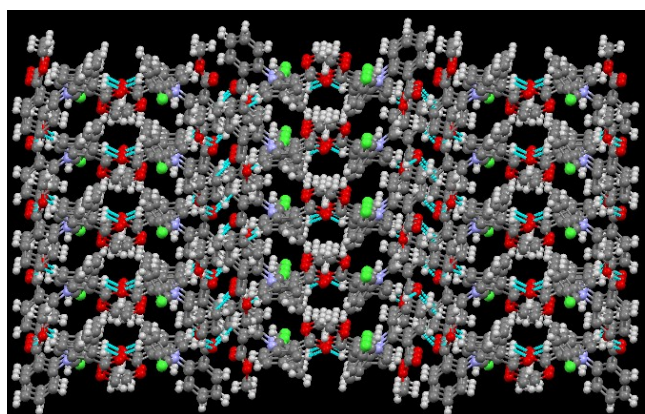

**Figure S15.** Packing mode of isomer *m*-CITPA in crystal.

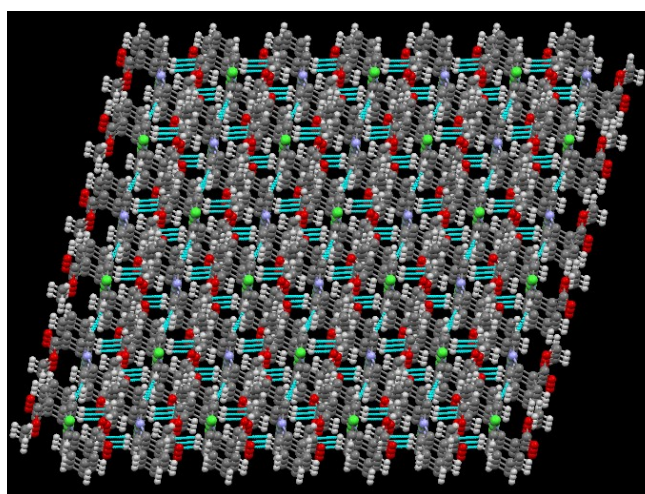

**Figure S16.** Packing mode of isomer *p*-CITPA in crystal.

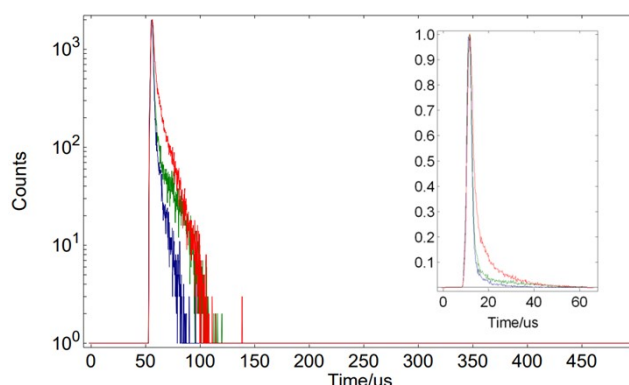

**Figure S17.** The temporal output of uF920H Xenon Flashlamp of FLS 980 measured at 300nm (blue), 450nm (green), and 600nm (red). The typical pulse width is  $2\mu\text{s}$ .

**Table S1.** Single crystal data of isomers *o*-CITPA, *m*-CITPA and *p*-CITPA.

| Isomer                             | <i>o</i> -CITPA              | <i>m</i> -CITPA            | <i>p</i> -CITPA                       |
|------------------------------------|------------------------------|----------------------------|---------------------------------------|
| Crystal system                     | monoclinic                   | monoclinic                 | monoclinic                            |
| Space group                        | $P2_1/n$<br>(centrosymmetry) | $C2/c$<br>(centrosymmetry) | $I2/a$ ( $C2/c$ )<br>(centrosymmetry) |
| $a/\text{\AA}$                     | 10.6439(2)                   | 12.3359(8)                 | 12.3515(2)                            |
| $b/\text{\AA}$                     | 13.6702(3)                   | 10.0026(10)                | 13.5365(2)                            |
| $c/\text{\AA}$                     | 13.2289(3)                   | 31.219(3)                  | 11.8984(2)                            |
| $\alpha/^\circ$                    | 90                           | 90                         | 90                                    |
| $\beta/^\circ$                     | 92.649(2)                    | 90.085(6)                  | 104.6010(10)                          |
| $\gamma/^\circ$                    | 90                           | 90                         | 90                                    |
| Volume/ $\text{\AA}^3$             | 1922.80(7)                   | 3852.1(6)                  | 1925.12(5)                            |
| Z                                  | 4                            | 8                          | 4                                     |
| $\rho_{\text{calc}}/\text{g/cm}^3$ | 1.367                        | 1.365                      | 1.366                                 |
| $\mu/\text{mm}^{-1}$               | 2.001                        | 0.227                      | 1.999                                 |
| F(000)                             | 824                          | 1648                       | 824                                   |
| h, k, lmax                         | 12, 16, 15                   | 15, 12, 39                 | 14, 15, 13                            |
| Nref                               | 3236                         | 4053                       | 1628                                  |
| Tmin, Tmax                         | 0.866, 1.000                 | 0.451, 1.000               | 0.808, 1.000                          |
| R(reflections)                     | 0.0803(2860)                 | 0.0683(3243)               | 0.0302(1548)                          |
| wR2(reflections)                   | 0.2263(3236)                 | 0.1772(4053)               | 0.0824(1628)                          |
| Data completeness                  | 0.992                        | 0.965                      | 0.992                                 |
| Theta(max)                         | 64.995                       | 26.988                     | 64.962                                |
| S                                  | 1.032                        | 1.091                      | 1.101                                 |
| Npar                               | 255                          | 255                        | 130                                   |

a) The single-crystal structures have been deposited at the Cambridge Crystallographic Data Centre and allocated the deposition number: *o*-CITPA (1816586), *m*-CITPA (1816585), and *p*-CITPA (1816587).

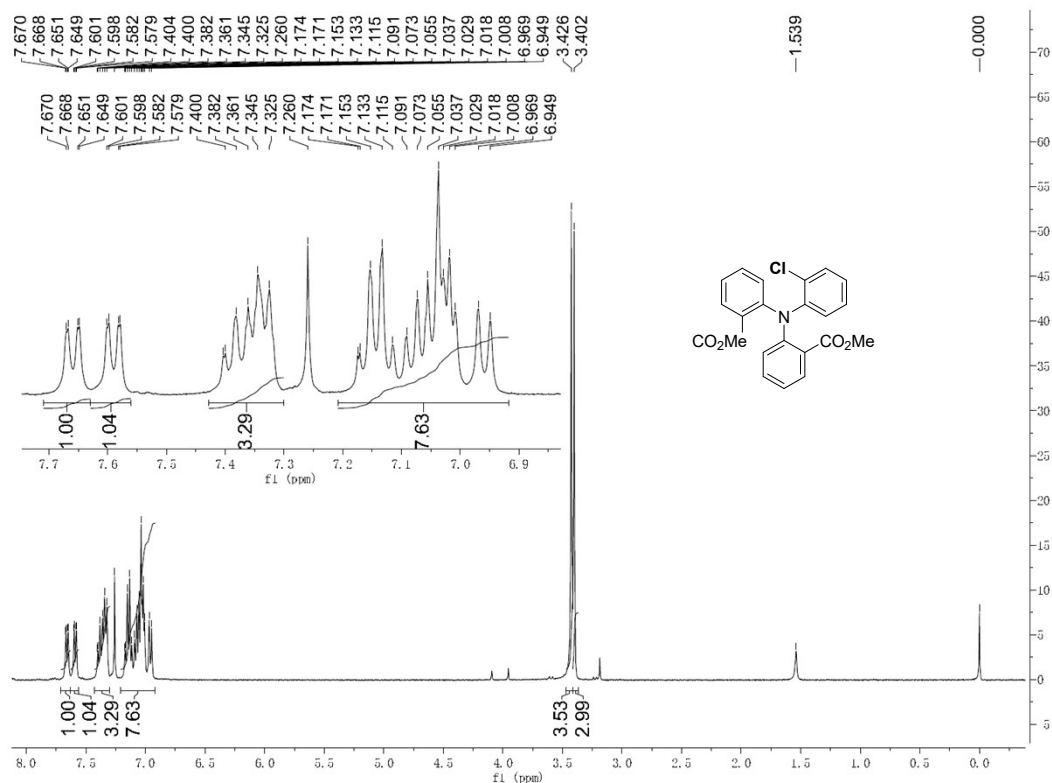

Figure S18. <sup>1</sup>H NMR spectrum of compound *o*-CITPA in CDCl<sub>3</sub>.

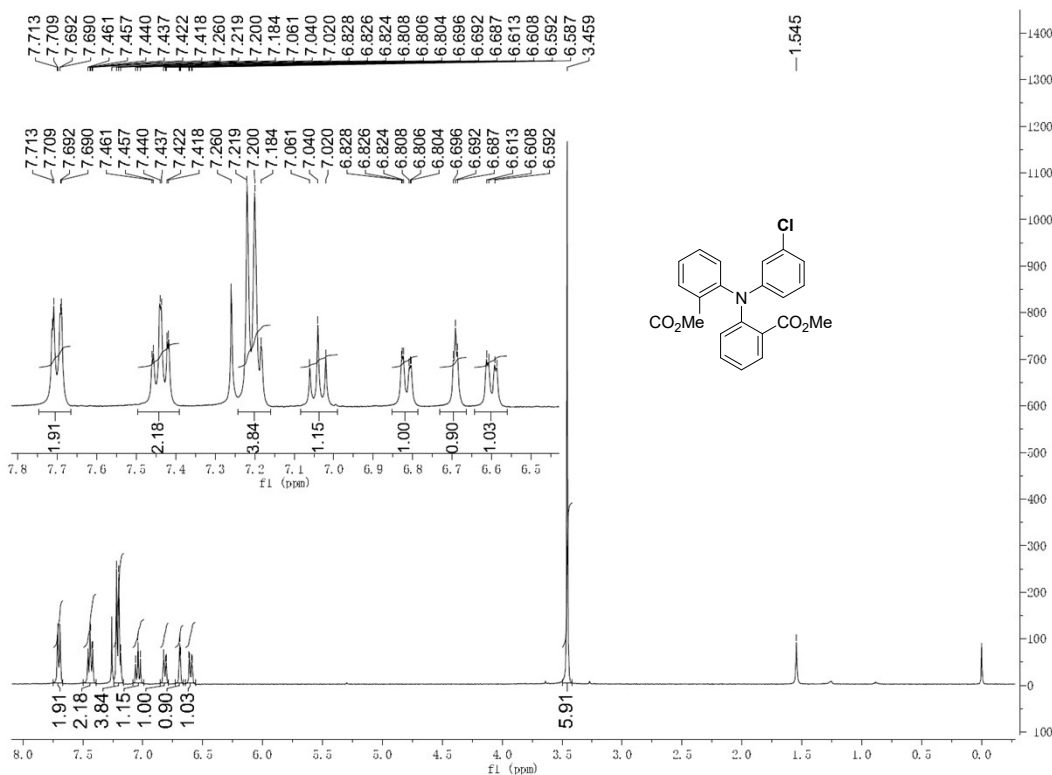

Figure S19. <sup>1</sup>H NMR spectrum of compound *m*-CITPA in CDCl<sub>3</sub>.

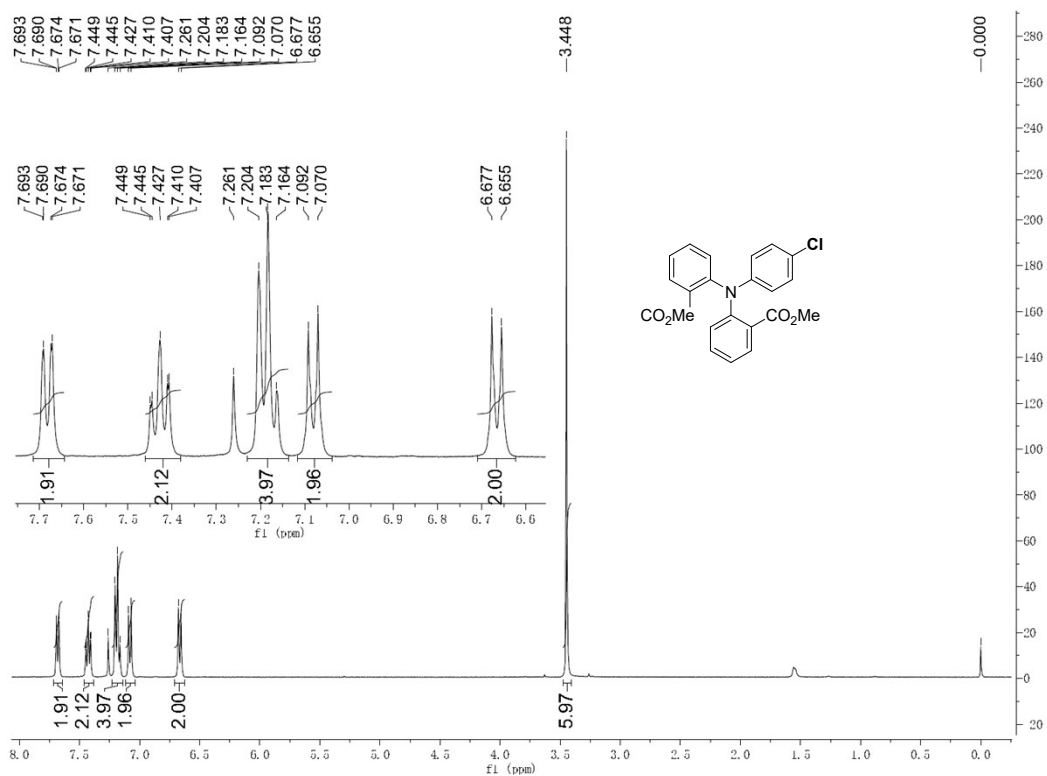

**Figure S20.**  $^1\text{H}$  NMR spectrum of compound *p*-CITPA in  $\text{CDCl}_3$ .

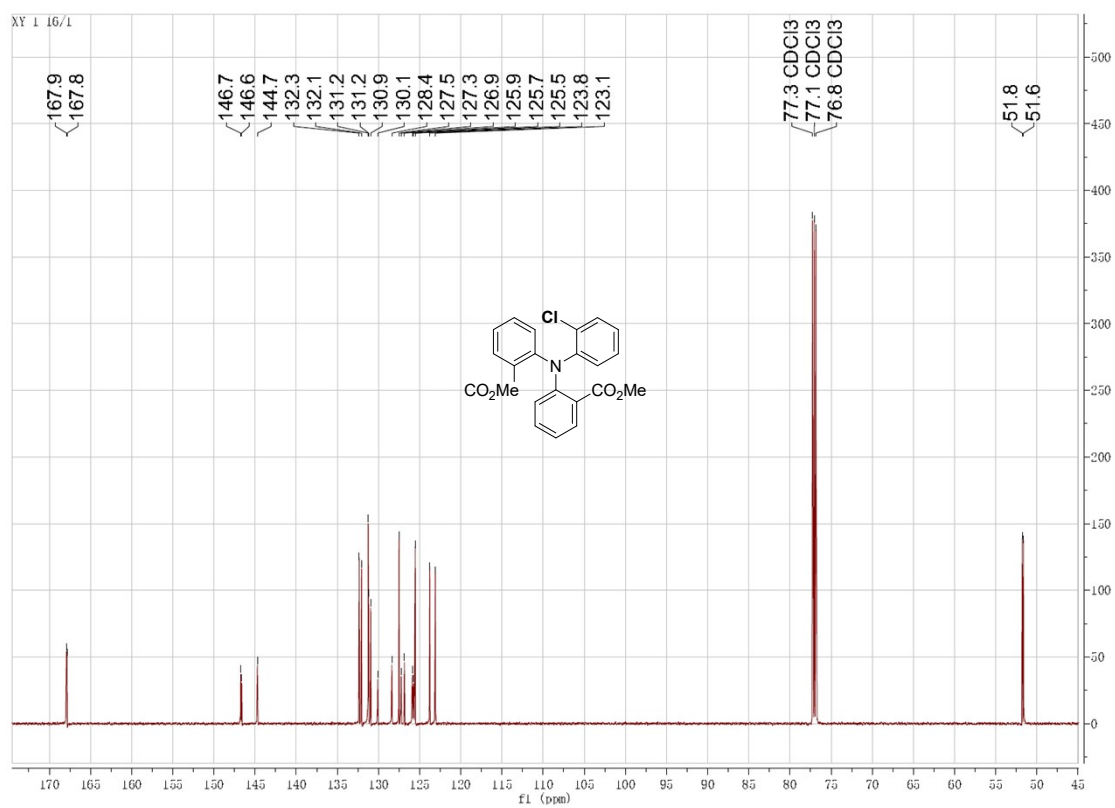

**Figure S21.**  $^{13}\text{C}$  NMR spectrum of compound *o*-CITPA in  $\text{CDCl}_3$ .



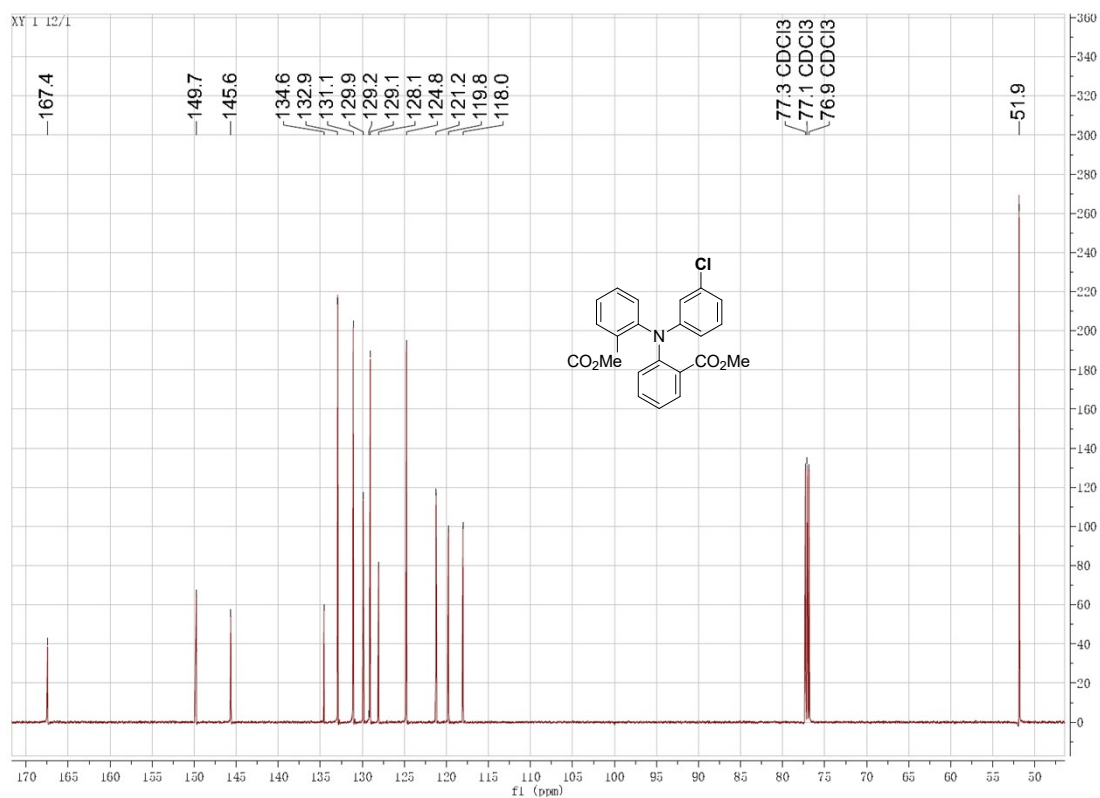

Figure S22. <sup>13</sup>C NMR spectrum of compound *m*-CITPA in CDCl<sub>3</sub>.

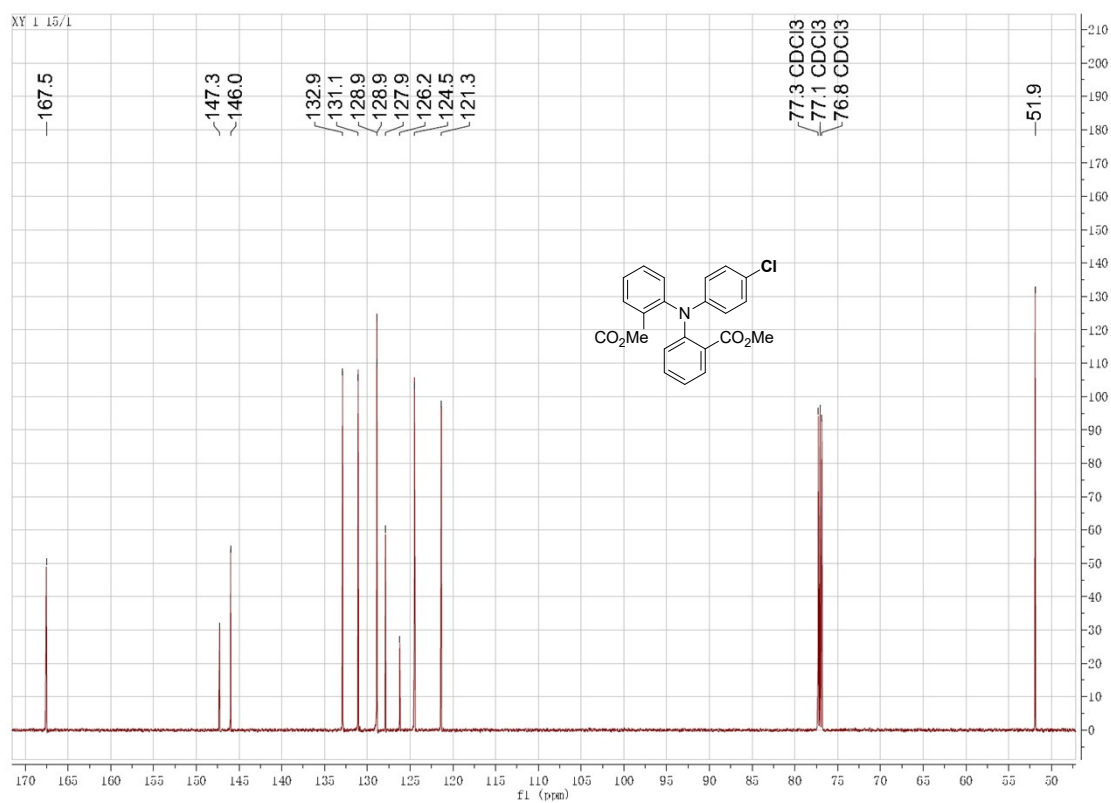

Figure S23. <sup>13</sup>C NMR spectrum of compound *p*-CITPA in CDCl<sub>3</sub>.

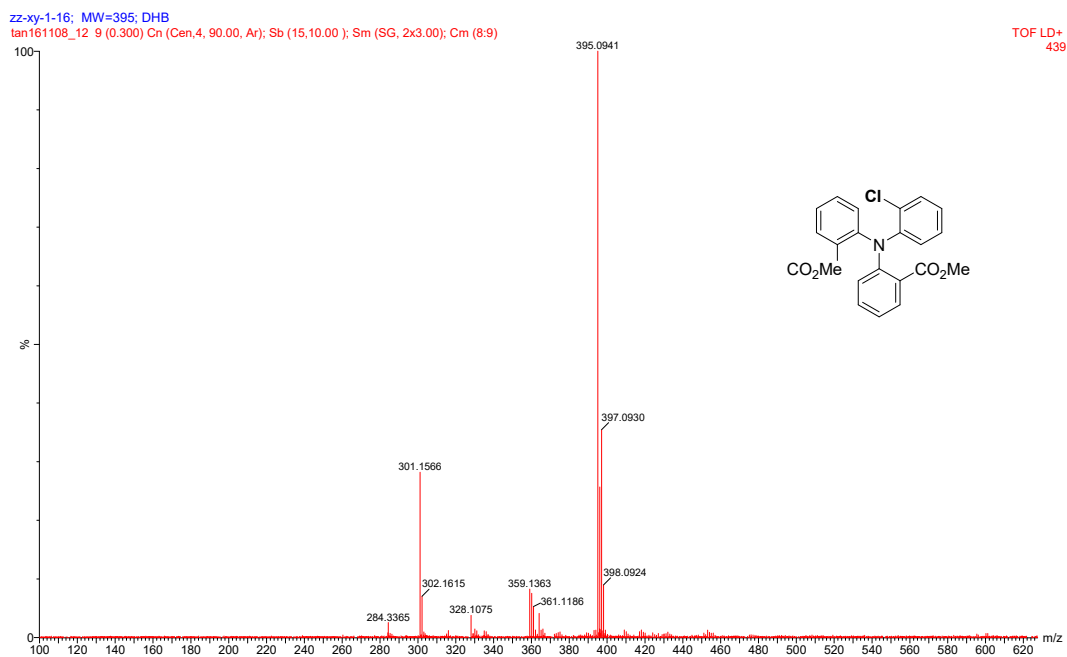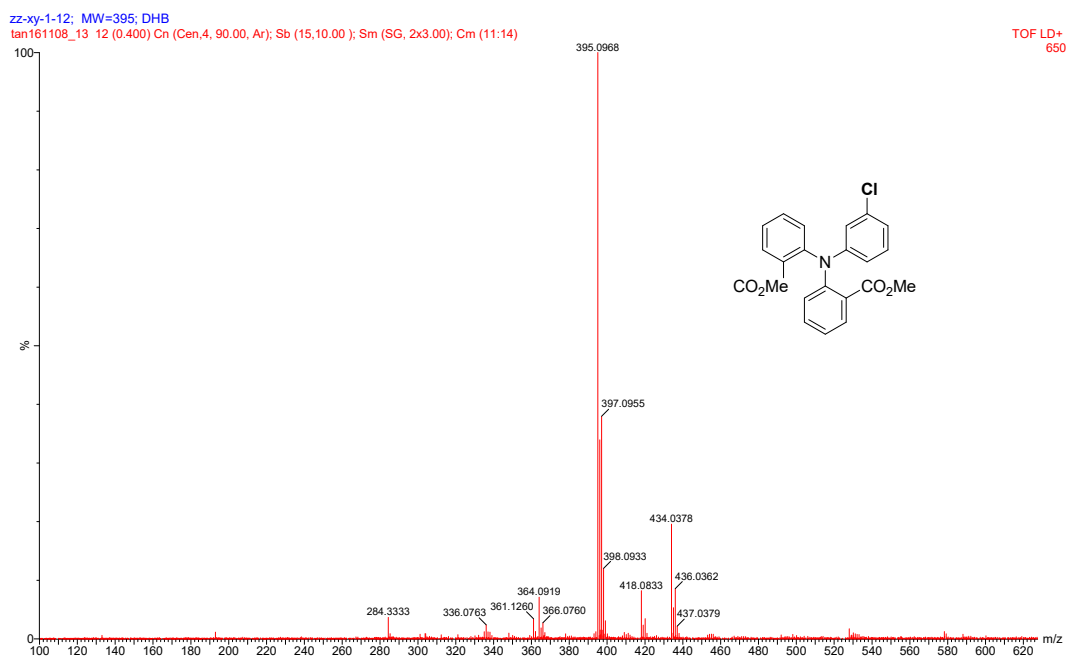



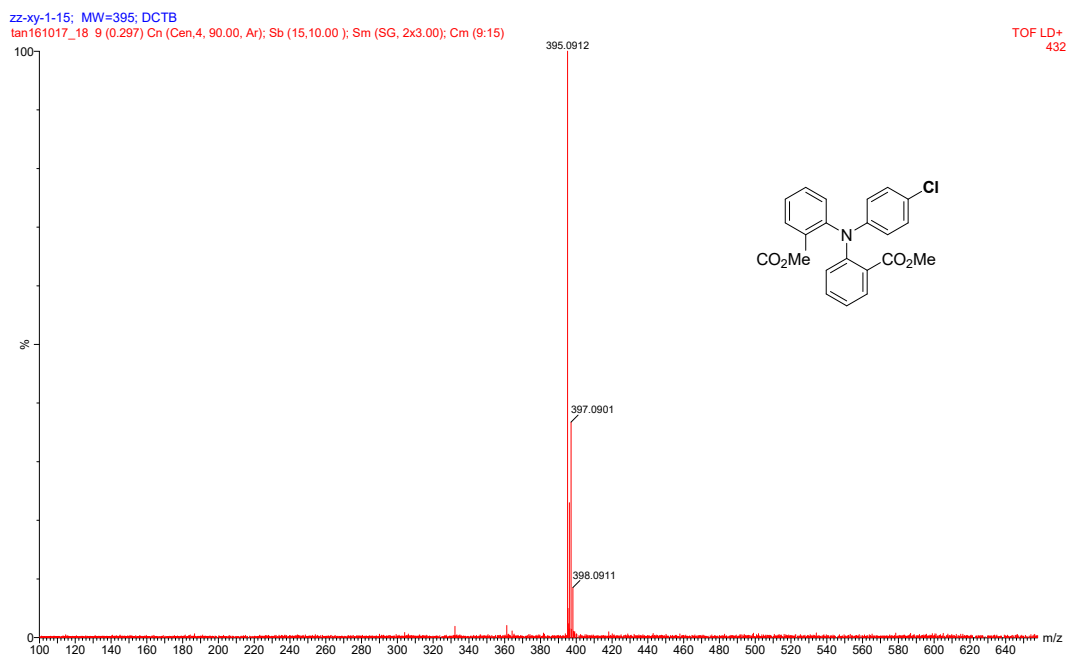

**Figure S26.** MALDI-TOF mass spectrum of compound *p*-CITPA.

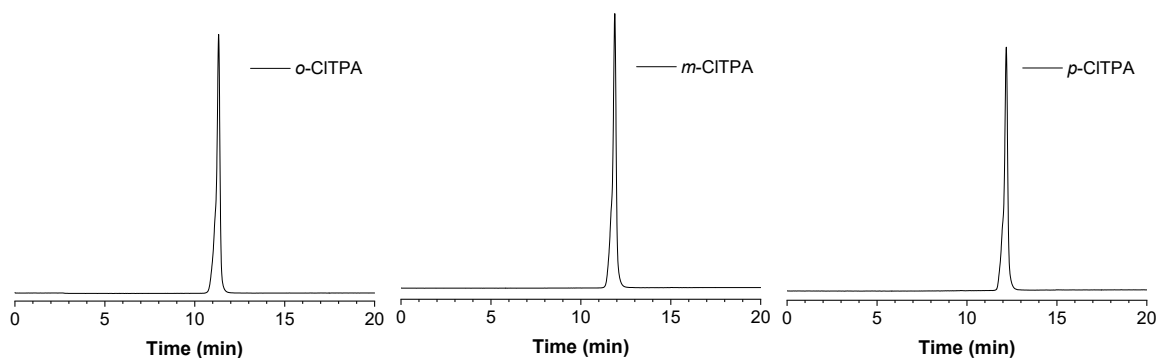

**Figure S27.** High-performance liquid chromatography diagrams of isomers *o*-CITPA, *m*-CITPA, and *p*-CITPA.

## 5. References

[1] Sherwood, P.; de Vries, A. H.; Guest, M. F.; Schreckenbach, G.; Catlow, R. C. A.; French, S. A.; Sokol, A. A.; Bromley, S. T.; Thiel, W.; Turner, A. J.; Billeter, S.; Terstegen, F.; Thiel, S.; Kendrick, J.; Rogers, S. C.; Casci, J.; Watson, M.; King, F.; Karlsen, E.; Sjøvoll, M.; Fahmi, A.; Schäfer, A.; Lennartz, C. QUASI: A General Purpose Implementation of the QM/MM Approach and Its Application to Problems in Catalysis. *J. Mol. Struct.: Theochem.* **2003**, *632*, 1-28.

- [2] Ahlrichs, R.; Bär, M.; Häser, M.; Horn, H.; Kölmel, C. Electronic Structure Calculations on Workstation Computers: The Program System Turbomole. *Chem. Phys. Lett.* **1989**, *162*, 165-169.
- [3] Smith, W.; Forester, T. R. DL\_POLY\_2.0: A General-Purpose Parallel Molecular Dynamics Simulation Package. *J. Mol. Graph.* **1996**, *14*, 136-141.
- [4] Wang, J.; Wolf, R. M.; Caldwell, J. W.; Kollman, P. A.; Case, D. A. Development and Testing of a General Amber Force Field. *J. Comput. Chem.* **2004**, *25*, 1157-1174.
- [5] Bayly, C. I.; Cieplak, P.; Cornell, W.; Kollman, P. A. A Well-Behaved Electrostatic Potential Based Method Using Charge Restraints for Deriving Atomic Charges: The RESP Model. *J. Phys. Chem.* **1993**, *97*, 10269-10280.
- [6] W. Liu, F. Wang, D. Dai, L. Li, M. Dolg, *Theor. Chem. Acc.* **1997**, *96*, 75-83.
- [7] W. Liu, G. Hong, L. Li, *J. Theor. Comput. Chem.* **2003**, *2*, 257-272.
- [8] K. Hirao, Y. Ishikawa, *Recent Advances in Computational Chemistry*, World Scientific, Singapore, **2004**, *5*, p257.
